# Supplementary material for: Cyanobacterial promoted enrichment of rare earth elements europium, samarium and neodymium and intracellular europium particle formation
Source: Royal Society of Chemistry journal article supplement (doi:10.1039/c9ra06570a), 2019-01-01
Supplement: c9ra06570a1.pdf [file c9ra06570a1.pdf]

## SUPPLEMENTARY INFORMATION

---

### CYANOBACTERIAL PROMOTED ENRICHMENT OF RARE EARTH ELEMENTS EUROPIUM, SAMARIUM AND NEODYMIUM AND INTRACELLULAR EUROPIUM PARTICLE FORMATION

*Christian B. Fischer*<sup>\*1,2</sup>, *Susanne Körsten*<sup>1</sup>, *Liz M. Rösken*<sup>1</sup>, *Felix Cappel*<sup>1</sup>, *Christian Beresko*<sup>3</sup>, *Georg Ankerhold*<sup>3</sup>, *Andreas Schönleber*<sup>4</sup>, *Stefan Geimer*<sup>5</sup>, *Dennis Ecker*<sup>6</sup>, *Stefan Wehner*<sup>1</sup>

<sup>1</sup> University of Koblenz-Landau, Campus Koblenz, Department of Physics, Universitätsstraße 1, 56070 Koblenz, Germany

<sup>2</sup> Mohammed VI Polytechnic University, Materials Science and Nano-Engineering Department, Lot 660, Hay Moulay Rachid, 43150 Benguerir, Morocco

<sup>3</sup> University of Applied Sciences Koblenz, RheinAhrCampus, Department of Laser Spectroscopy, Joseph-Rovan-Allee 2, 53424 Remagen, Germany

<sup>4</sup> University of Bayreuth, Laboratory of Crystallography, 95447 Bayreuth, Germany

<sup>5</sup> University of Bayreuth, Cell Biology and Electron Microscopy, 95447 Bayreuth, Germany

<sup>6</sup> Federal Institute of Hydrology, Department G2-Aquatic Chemistry, Am Mainzer Tor 1, 56068 Koblenz, Germany

\* **Corresponding author:** University of Koblenz-Landau, Campus Koblenz, Department of Physics, Universitätsstraße 1, 56070 Koblenz, Germany

email address: [chrbfischer@uni-koblenz.de](mailto:chrbfischer@uni-koblenz.de)

### List of content

**Page S2:** ICP-MS results including errors for the time dependent decrease of  $\text{Eu}^{3+}$  concentration ( $C_{\text{initial}} = 0.111 \text{ mM Eu}^{3+}$ ) present in supernatant after incubation of *Anabaena* spec. (**Figure S1** and **Table S1**).

**Page S3:** ICP-MS results including errors for the time dependent decrease of  $\text{Nd}^{3+}$  concentration ( $C_{\text{initial}} = 0.103 \text{ mM Nd}^{3+}$ ) present in supernatant after incubation of *Anabaena cylindrica* (**Figure S2** and **Table S2**).

**Page S4:** ICP-MS results including errors for the time dependent decrease of  $\text{Sm}^{3+}$  concentration ( $C_{\text{initial}} = 0.139 \text{ mM Sm}^{3+}$ ) present in supernatant after incubation of *Anabaena cylindrica* (**Figure S3** and **Table S3**).

**Page S5:** ICP-MS results including errors for the time dependent decrease of  $\text{Eu}^{3+}$  concentration ( $C_{\text{initial}} = 0.191 \text{ mM Eu}^{3+}$ ) present in supernatant after incubation of *Anabaena* spec. (**Figure S4** and **Table S4**).

ICP-MS results including errors for the time dependent decrease of  $\text{Eu}^{3+}$  concentration ( $C_{\text{initial}} = 0.111 \text{ mM Eu}^{3+}$ ) present in supernatant after incubation of *Anabaena* spec.

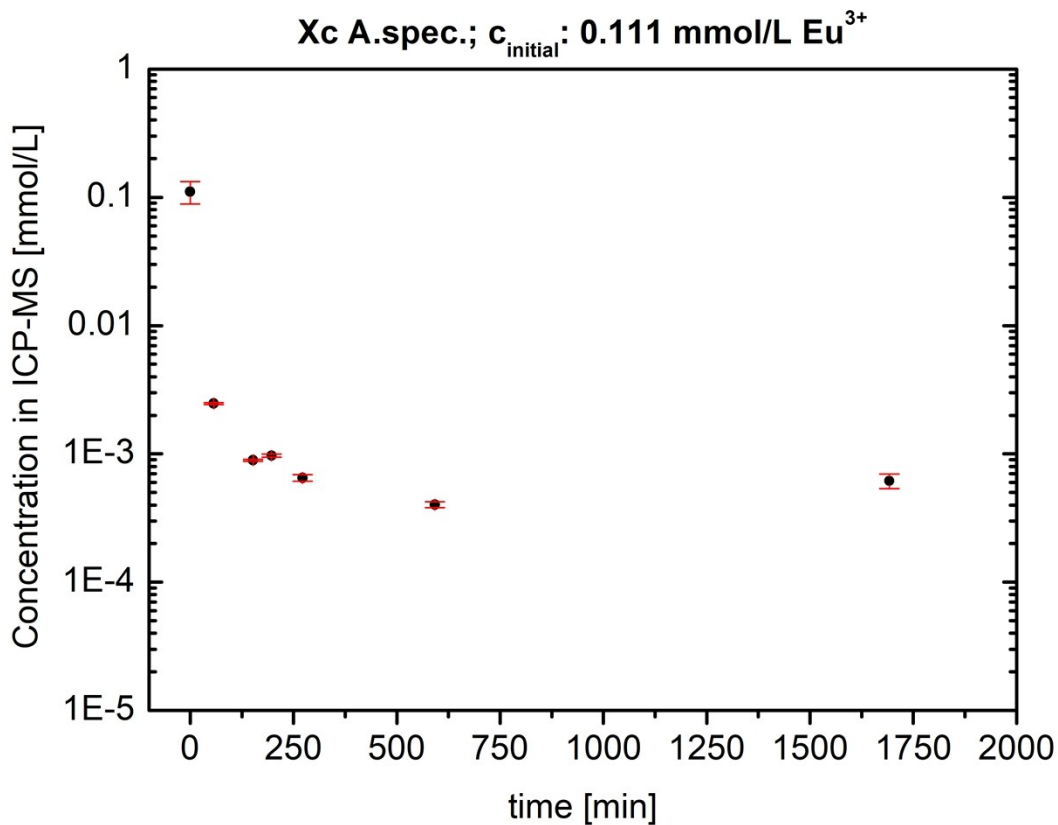

**Figure S1:** Time dependent decrease of  $\text{Eu}^{3+}$  concentration present in supernatant after incubation of *Anabaena* spec. with an overall concentration of 0.111 mM (error bars highlighted in red for clarity). First data point at 0 minutes means the initial REE<sup>3+</sup> concentration of the added stock solution in appropriate dilution without biomass ( $C_{\text{initial}}$ ).

**Table S1:** ICP-MS data for the time dependent decrease of  $\text{Eu}^{3+}$  ( $C_{\text{initial}} = 0.111 \text{ mM}$ ) present in supernatant after incubation of *Anabaena* spec.

| t (min) | c [mmol/L] | RSD [mmol/L] | Analyte   |
|---------|------------|--------------|-----------|
| 0       | 0.111      | 2.21E-2      | <b>Eu</b> |
| 57      | 2.47E-3    | 4.53E-5      |           |
| 152     | 8.93E-4    | 1.40E-5      |           |
| 197     | 9.70E-4    | 2.63E-5      |           |
| 272     | 6.51E-4    | 3.79E-5      |           |
| 592     | 4.02E-4    | 2.08E-5      |           |
| 1692    | 6.16E-4    | 8.09E-5      |           |

ICP-MS results including errors for the time dependent decrease of  $\text{Nd}^{3+}$  concentration ( $c_{\text{initial}} = 0.103 \text{ mM Nd}^{3+}$ ) present in supernatant after incubation of *Anabaena cylindrical*.

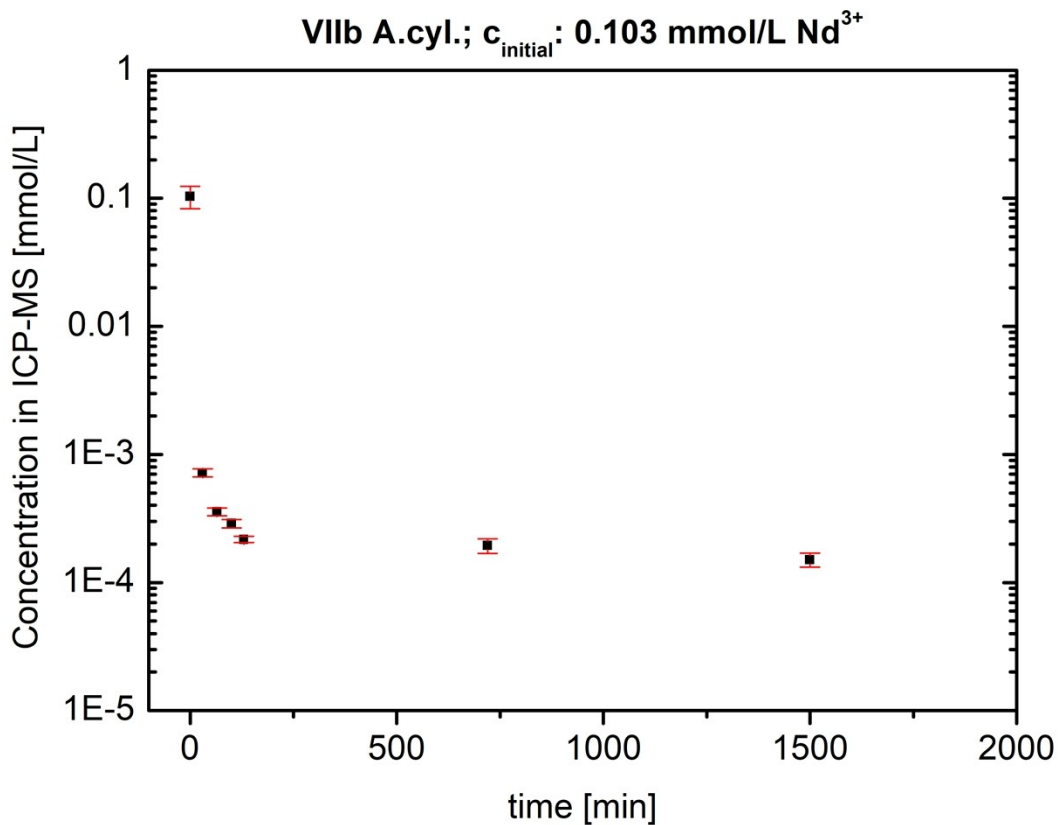

**Figure S2:** Time dependent decrease of  $\text{Nd}^{3+}$  concentration present in supernatant after incubation of *Anabaena cylindrical* with an overall concentration of 0.103 mM (error bars highlighted in red for clarity). First data point at 0 minutes means the initial REE<sup>3+</sup> concentration of the added stock solution in appropriate dilution without biomass ( $c_{\text{initial}}$ ).

**Table S2:** ICP-MS data for the time dependent decrease of  $\text{Nd}^{3+}$  ( $c_{\text{initial}} = 0.103 \text{ mM}$ ) present in supernatant after incubation of *Anabaena cylindrical*.

| t (min) | c [mmol/L] | RSD [mmol/L] | Analyte   |
|---------|------------|--------------|-----------|
| 0       | 0.103      | 2.07E-2      | <b>Nd</b> |
| 30      | 7.19E-4    | 5.28E-5      |           |
| 65      | 3.56E-4    | 2.50E-5      |           |
| 100     | 2.89E-4    | 2.22E-5      |           |
| 130     | 2.17E-4    | 1.27E-5      |           |
| 720     | 1.94E-4    | 2.53E-5      |           |
| 1500    | 1.51E-4    | 1.90E-5      |           |

ICP-MS results including errors for the time dependent decrease of  $\text{Sm}^{3+}$  concentration ( $C_{\text{initial}} = 0.139 \text{ mM Sm}^{3+}$ ) present in supernatant after incubation of *Anabaena cylindrica*.

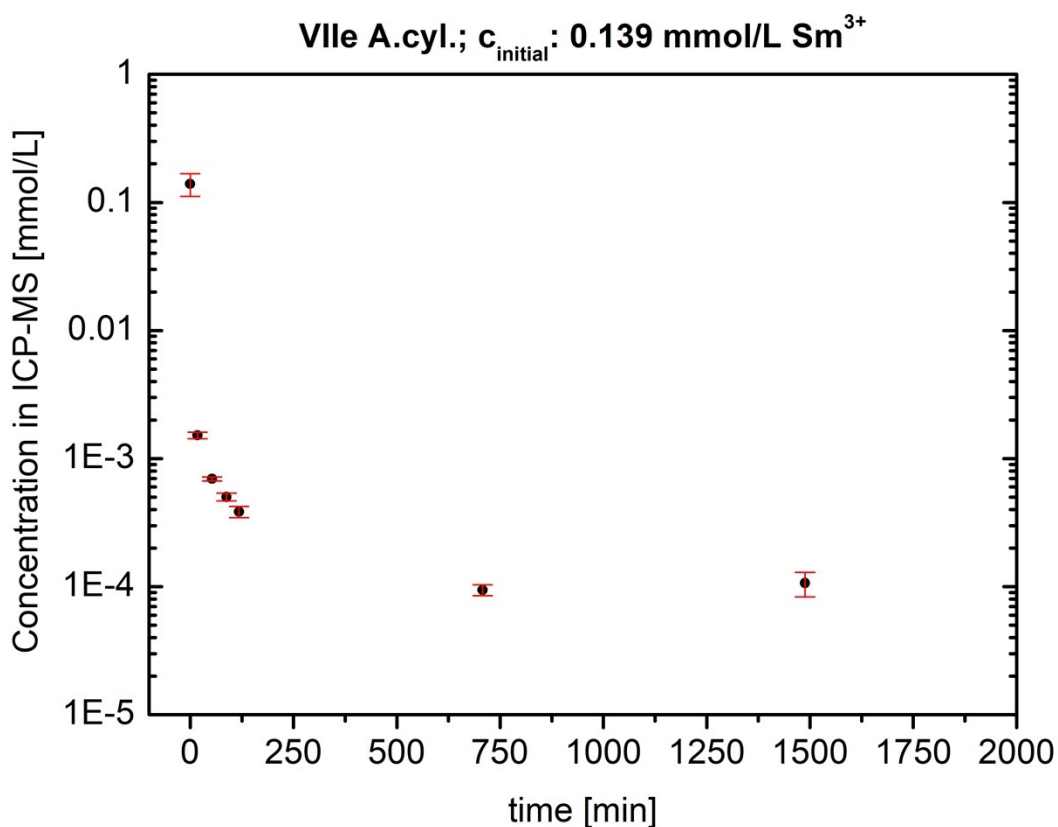

**Figure S3:** Time dependent decrease of  $\text{Sm}^{3+}$  concentration present in supernatant after incubation of *Anabaena cylindrica* with an overall concentration of 0.139 mM (error bars highlighted in red for clarity). First data point at 0 min means the initial REE<sup>3+</sup> concentration of the added stock solution in appropriate dilution without biomass ( $C_{\text{initial}}$ ).

**Table S3:** ICP-MS data for the time dependent decrease of  $\text{Sm}^{3+}$  ( $C_{\text{initial}} = 0.139 \text{ mM}$ ) present in supernatant after incubation of *Anabaena cylindrica*.

| <b>t<br/>(min)</b> | <b>c<br/>[mmol/L]</b> | <b>RSD<br/>[mmol/L]</b> | <b>Analyte</b> |
|--------------------|-----------------------|-------------------------|----------------|
| 0                  | 0.139                 | 2.79E-2                 | <b>Sm</b>      |
| 18                 | 1.52E-3               | 9.02E-5                 |                |
| 53                 | 6.95E-4               | 2.40E-5                 |                |
| 88                 | 5.01E-4               | 3.45E-5                 |                |
| 118                | 3.84E-4               | 3.86E-5                 |                |
| 708                | 9.42E-5               | 9.09E-6                 |                |
| 1488               | 1.06E-4               | 2.31E-5                 |                |

ICP-MS results including errors for the time dependent decrease of  $\text{Eu}^{3+}$  concentration ( $c_{\text{initial}} = 0.191 \text{ mM Eu}^{3+}$ ) present in supernatant after incubation of *Anabaena spec.*

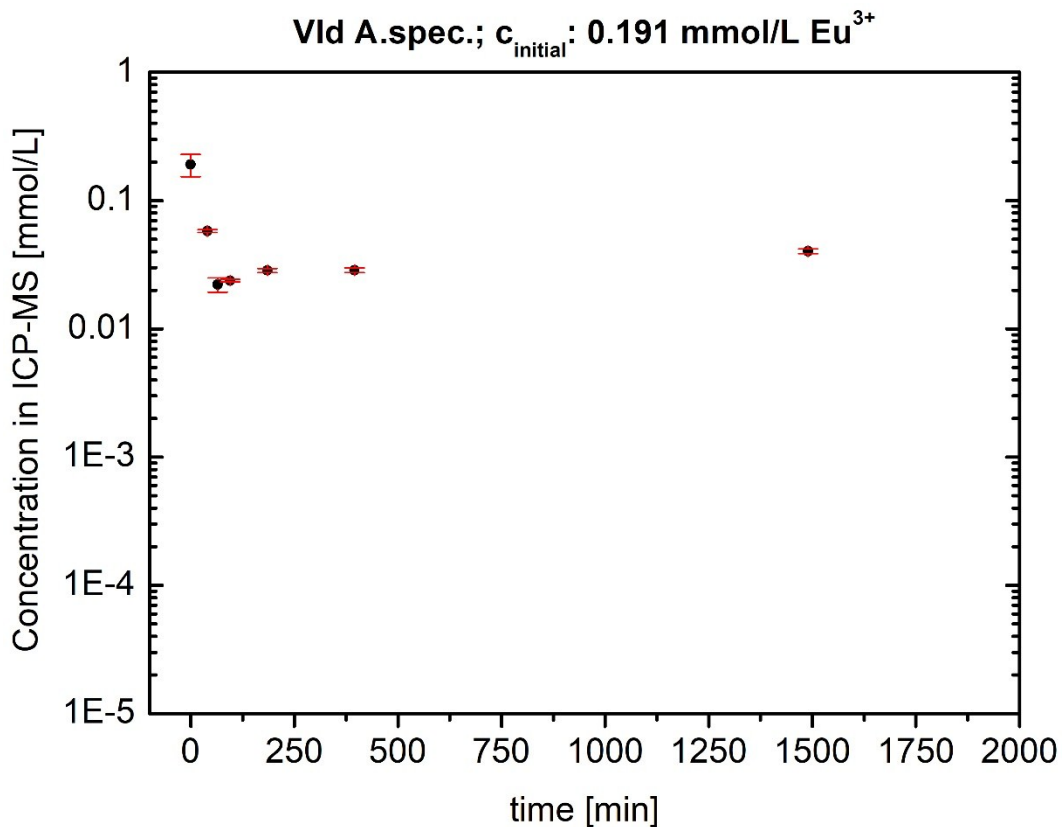

**Figure S4:** Time dependent decrease of  $\text{Eu}^{3+}$  concentration present in supernatant after incubation of *Anabaena spec.* with an overall concentration of  $0.191 \text{ mM Eu}^{3+}$  (error bars highlighted in red for clarity). First data point at 0 minutes means the initial REE $^{3+}$  concentration of the added stock solution in appropriate dilution without biomass ( $c_{\text{initial}}$ ). The series differs in its growth condition compared to the  $0.111 \text{ mM Eu}^{3+}$ , as this one was starving, meaning grown without any additional nutrients.

**Table S4:** ICP-MS data for the time dependent decrease of  $\text{Eu}^{3+}$  ( $c_{\text{initial}} = 0.191 \text{ mM}$ ) present in supernatant after incubation of *Anabaena spec.*

| t (min) | c [mmol/L] | RSD [mmol/L] | Analyte |
|---------|------------|--------------|---------|
| 0       | 0.191      | 3.83E-2      | Eu      |
| 40      | 5.79E-2    | 1.47E-3      |         |
| 65      | 2.21E-2    | 2.81E-3      |         |
| 95      | 2.37 E-2   | 5.86E-4      |         |
| 185     | 2.85E-2    | 9.73E-4      |         |
| 395     | 2.87E-2    | 1.21 E-3     |         |
| 1490    | 4.03 E-2   | 1.68 E-3     |         |
